# Supplementary material for: Ovarian Cancer-Cell Pericellular Hyaluronan Deposition Negatively Impacts Prognosis of Ovarian Cancer Patients
Source: MDPI journal article supplement (doi:10.3390/biomedicines10112944), 2022-11-16

Supplementary Material

**Figure S1: Correlations between HA staining pattern and histopathologic parameter**

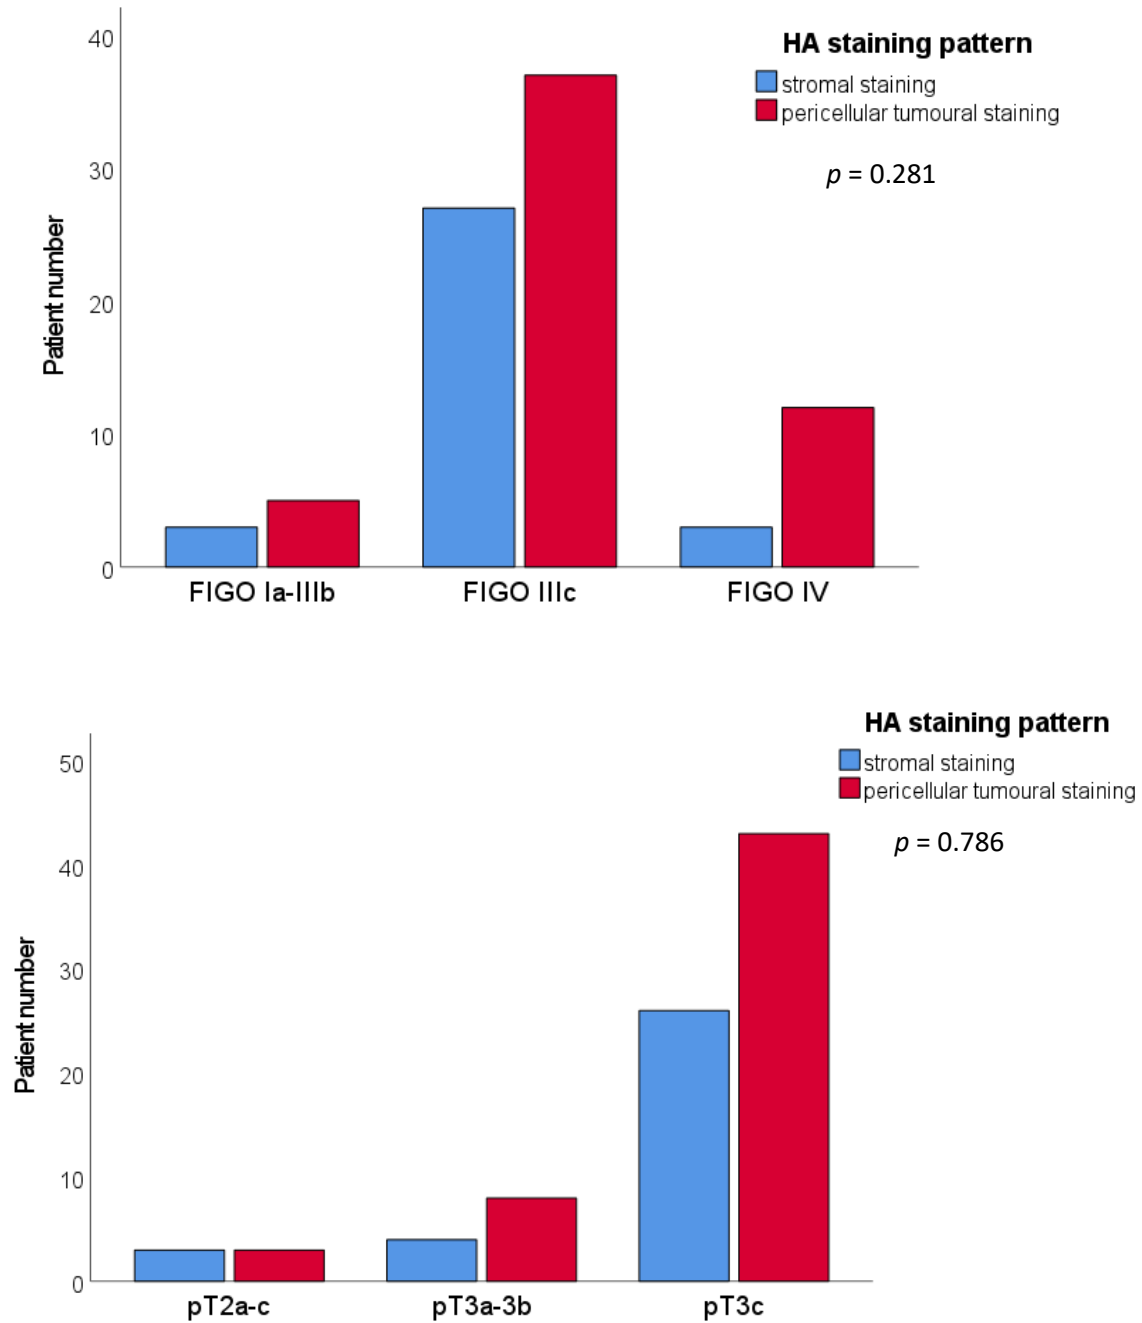

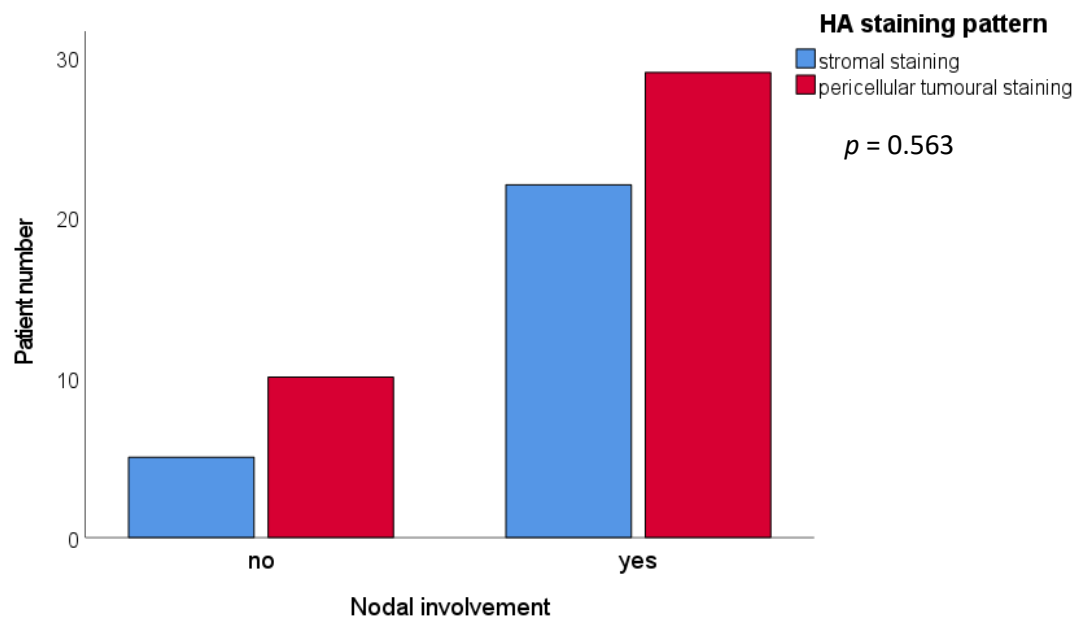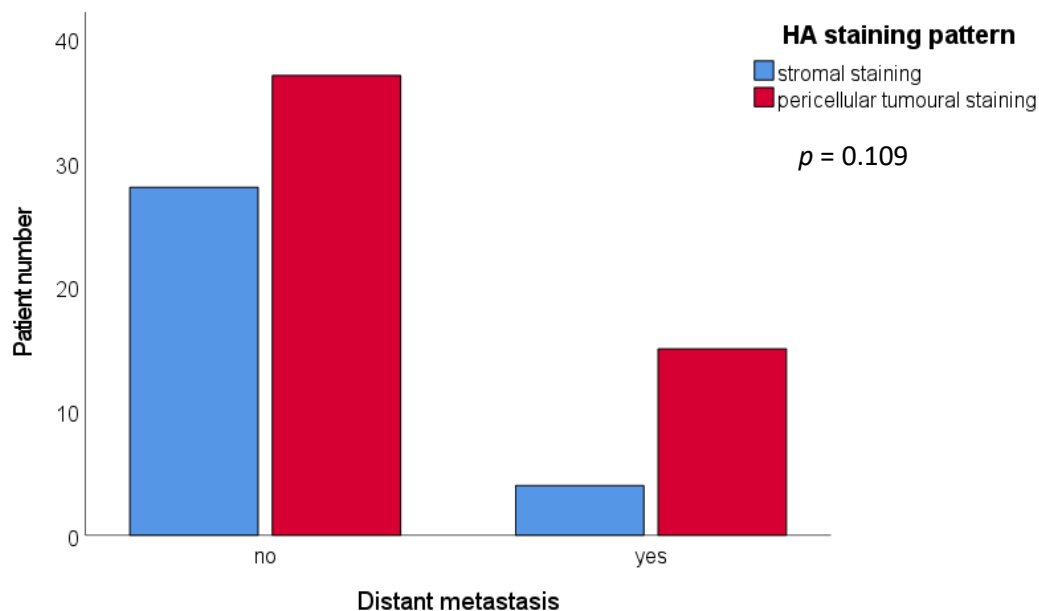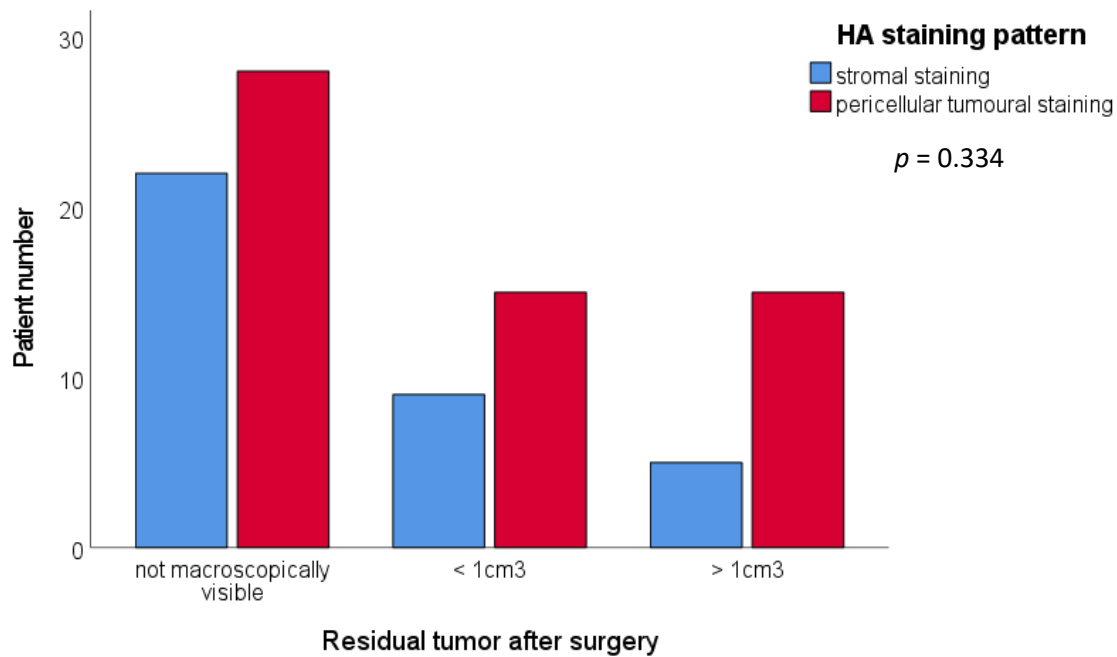

Figure S2: Correlations between HA staining intensity and histopathologic parameter

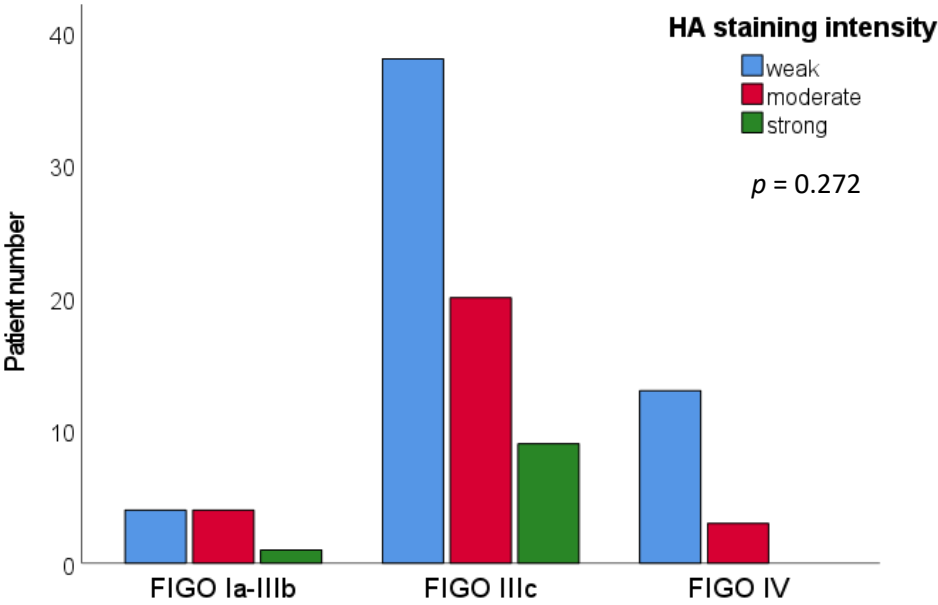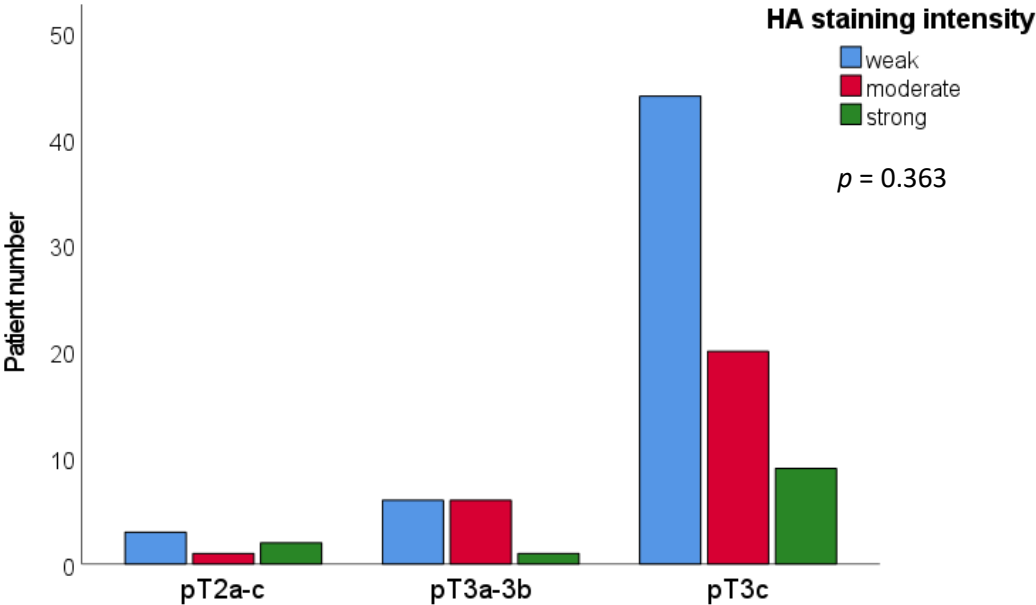

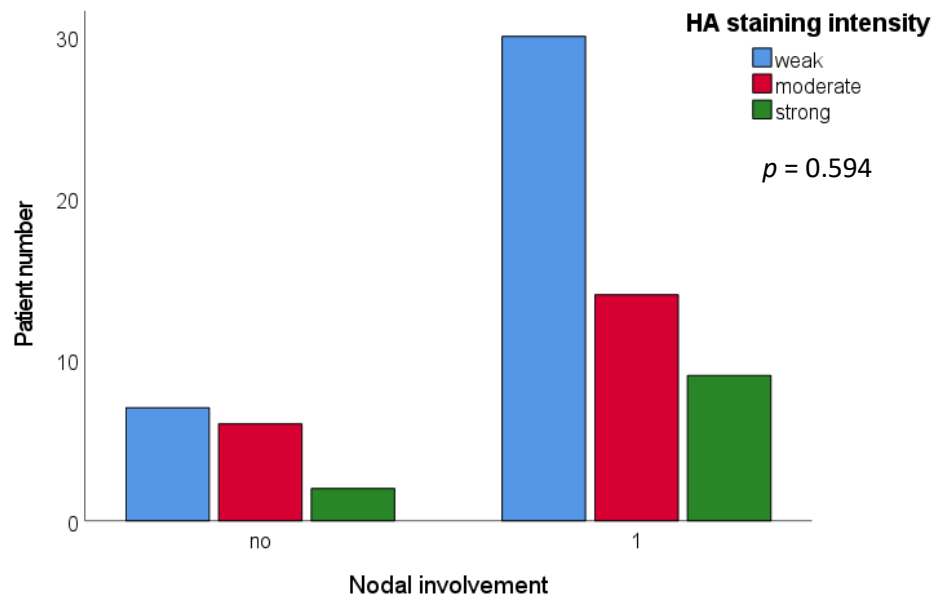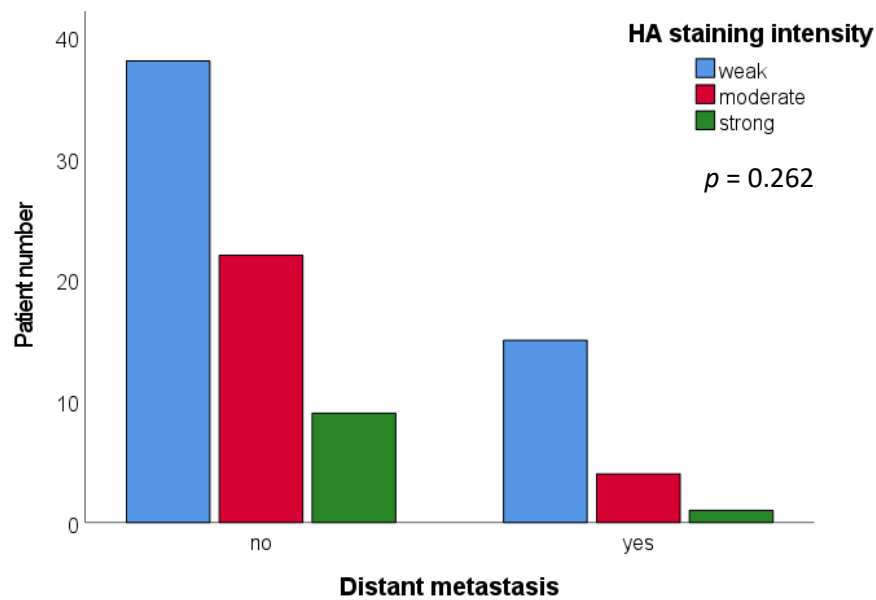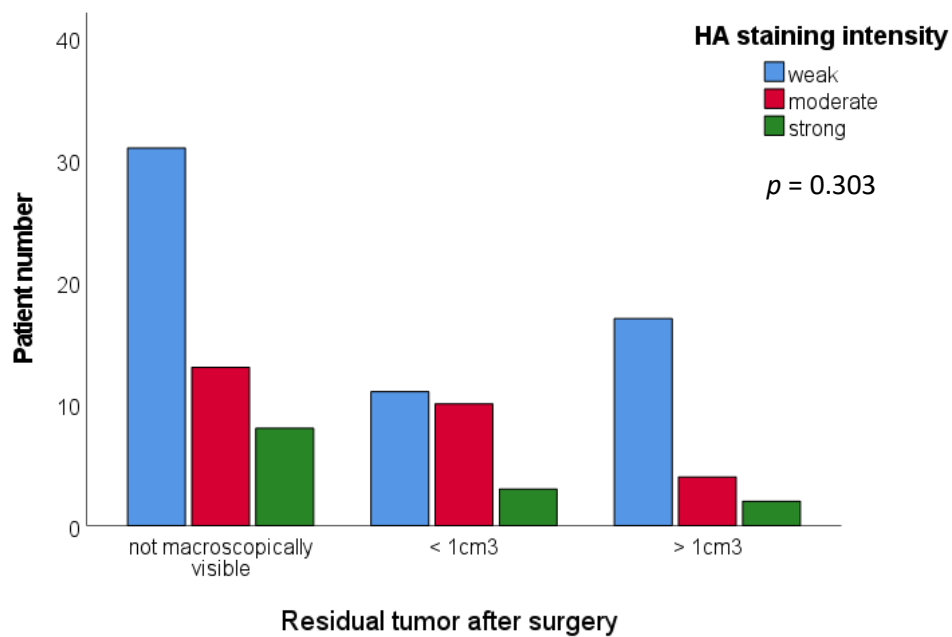

Supplement: s1 [file s1]
